# Supplementary material for: Synthesis of CuxNi(1−x)O coral-like nanostructures and their application in the design of a reusable toxic heavy metal ion sensor based on an adsorption-mediated electrochemical technique
Source: Royal Society of Chemistry journal article supplement (doi:10.1039/c6en00285d), 2016-11-10
Supplement: c6en00285d1.pdf [file c6en00285d1.pdf]

## **Synthesis of $\text{Cu}_x\text{Ni}_{(1-x)}\text{O}$ coral like nanostructures and its application in design of re-usable toxic heavy metal ion sensor based on adsorption mediated electrochemical technique**

### **Electronic Supplementary Information**

#### **Synthesis of NiO, $\text{Ni}_2\text{O}_3$ and $\text{Cu}_x\text{Ni}_{(1-x)}\text{O}$ hierarchical nanostructures**

In a typical experiment, 1.57 g of  $\text{Ni}(\text{NO}_3)_2 \cdot 6\text{H}_2\text{O}$ , 1.57 g of  $\text{NH}_2\text{-CO-NH}_2$  (Urea) and 0.3 g polyethylene glycol (PEG) were dissolved in 65 ml DI water. For doping, a mixture of Cu and Ni salts are added maintaining desired ratio of Cu:Ni (by weight). The nucleation is started by adjusting the pH at around 11 when the precipitation of  $\text{Ni}(\text{OH})_2$  just starts. Then the solution is transferred to a Teflon lined steel autoclave and was treated hydrothermally at  $100^\circ\text{C}$  for 5 hours. The resultant precipitate so obtained was washed with DI water for several times and dried to obtain powder of pure/doped nickel hydroxide. For NiO and Cu doped NiO, the pure/doped hydroxide was calcined at  $450^\circ\text{C}$  for 3 hours. While for  $\text{Ni}_2\text{O}_3$ , the hydroxide is treated with sodium hypochlorite till the effervescence ceases. The black precipitate is centrifuged, washed and dried to obtain fine powder of  $\text{Ni}_2\text{O}_3$  hierarchical nanostructures.

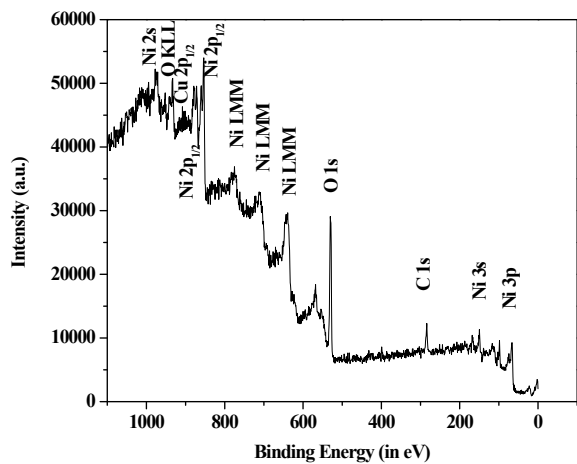

(a)

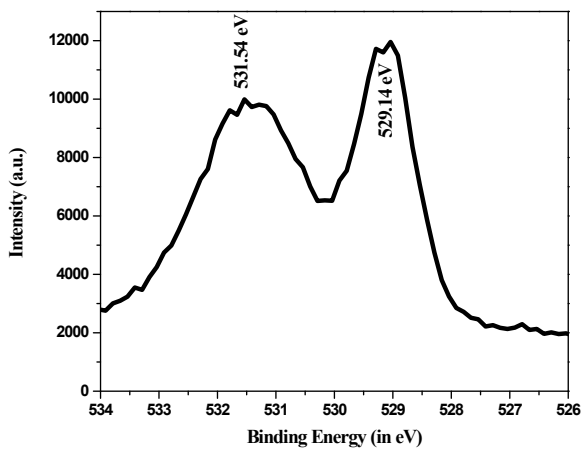

(b)

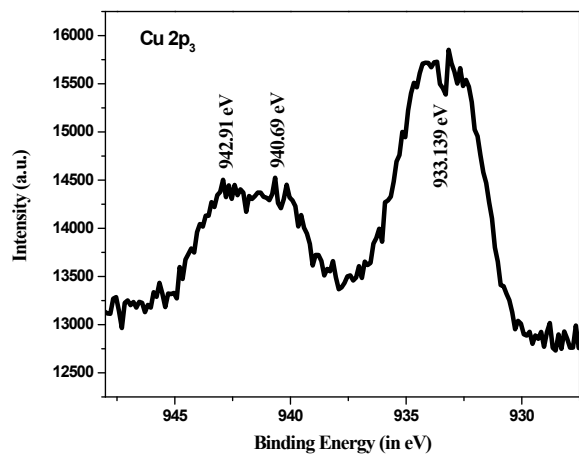

(c)

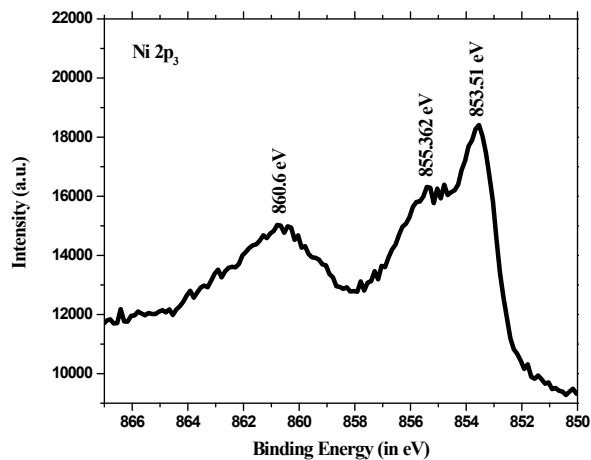

(d)

Figure S1: XPS Spectra of  $\text{Cu}_x\text{Ni}_{(1-x)}\text{O}$  nanostructures for chemical composition analysis (a) Overall XPS spectrum of the sample (b) XPS peaks of O 1s (c) XPS peaks of Cu  $2p_3$  (d) XPS peaks of Ni  $2p_3$

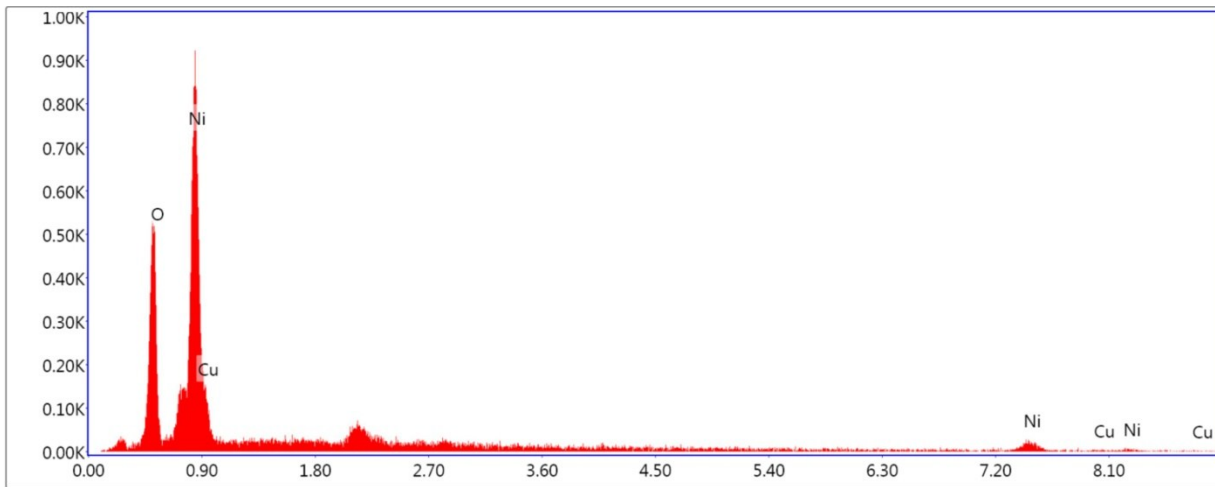

**Figure S2: EDAX of Cu doped NiO hierarchical nanostructure**

| Element | Weight % | Atomic % | Net Int. | Error % | K ratio | Z    | R    | A    | F |
|---------|----------|----------|----------|---------|---------|------|------|------|---|
| O K     | 24.73    | 54.92    | 1,293.04 | 6.52    | 0.21    | 1.23 | 0.89 | 0.67 | 1 |
| Ni L    | 64.95    | 39.31    | 1,670.02 | 4.14    | 0.54    | 0.93 | 1.04 | 0.89 | 1 |
| Cu L    | 10.32    | 5.77     | 166.36   | 19.07   | 0.05    | 0.89 | 1.05 | 0.5  | 1 |

**Table S1: EDAX data of  $\text{Cu}_x\text{Ni}_{(1-x)}\text{O}$  nanostructures**

### **Batch adsorption technique for Cr(VI) ion adsorption**

For batch adsorption technique, 0.4 g of  $K_2Cr_2O_7$  is dissolved in 200 mL DI water to prepare the stock solution. The different concentration is prepared by performing serial dilution to the stock solution. In a typical experiment of a particular concentration, 5 mL of stock solution of required dilution is taken in a 100 mL beaker and 0.02 g of adsorbent is added to it under constant stirring. The stirring is continued for 5 minutes. Then the solution is filtered and the supernatant is tested under UV-Visible spectrophotometer to observe any decrease in the peak for Cr(VI) ion in the spectra with respect to control solution (solution not exposed to the adsorbent). Any decrease in absorbance can be related to the amount of Cr(VI) ions adsorbed and hence adsorption can be tested.

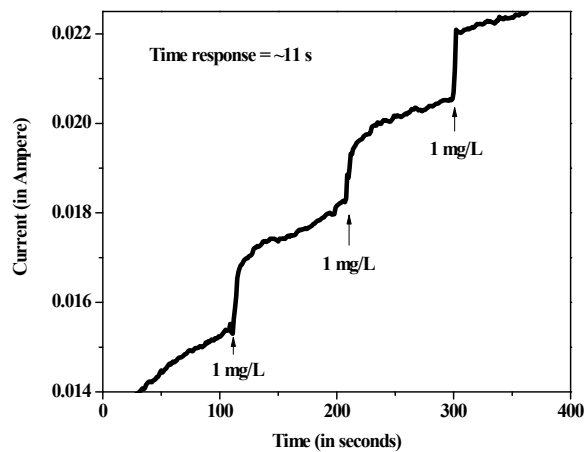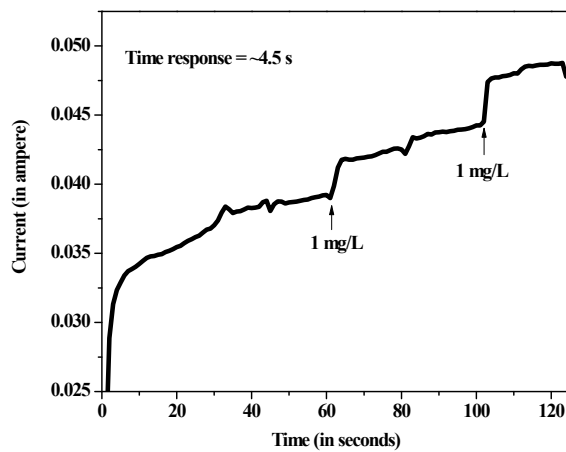

Figure S3: Time response of 5% and 20% Cu doped NiO hierarchical nanostructure respectively (amperometric measurement)

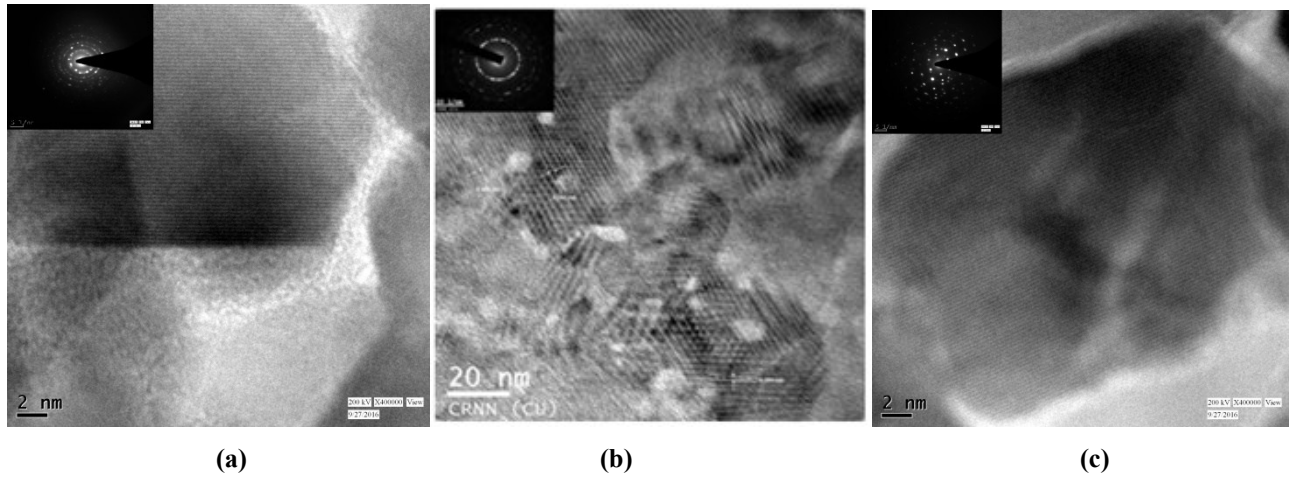

**Figure S4: Lattice images and SAED patterns of (a) NiO (b) Ni<sub>2</sub>O<sub>3</sub> (c) Cu<sub>x</sub>Ni<sub>(1-x)</sub>O coral like nanostructures**

Sample Name: CuNiO 1

SOP Name: mansettings.nano

File Name: rishi-go.dts

Record Number: 95

Date and Time: Thursday, September 22, 2016 3:00:19 ...

Dispersant Name: Water

Dispersant RI: 1.330

Viscosity (cP): 0.8872

Dispersant Dielectric Constant: 78.5

Temperature (°C): 25.0

Zeta Runs: 12

Count Rate (kcps): 75.9

Measurement Position (mm): 2.00

Cell Description: Clear disposable zeta cell

Attenuator: 6

|                             | Mean (mV)    | Area (%) | St Dev (mV) |
|-----------------------------|--------------|----------|-------------|
| Zeta Potential (mV): 5.51   | Peak 1: 5.51 | 100.0    | 4.94        |
| Zeta Deviation (mV): 4.94   | Peak 2: 0.00 | 0.0      | 0.00        |
| Conductivity (mS/cm): 0.248 | Peak 3: 0.00 | 0.0      | 0.00        |

Result quality : Good

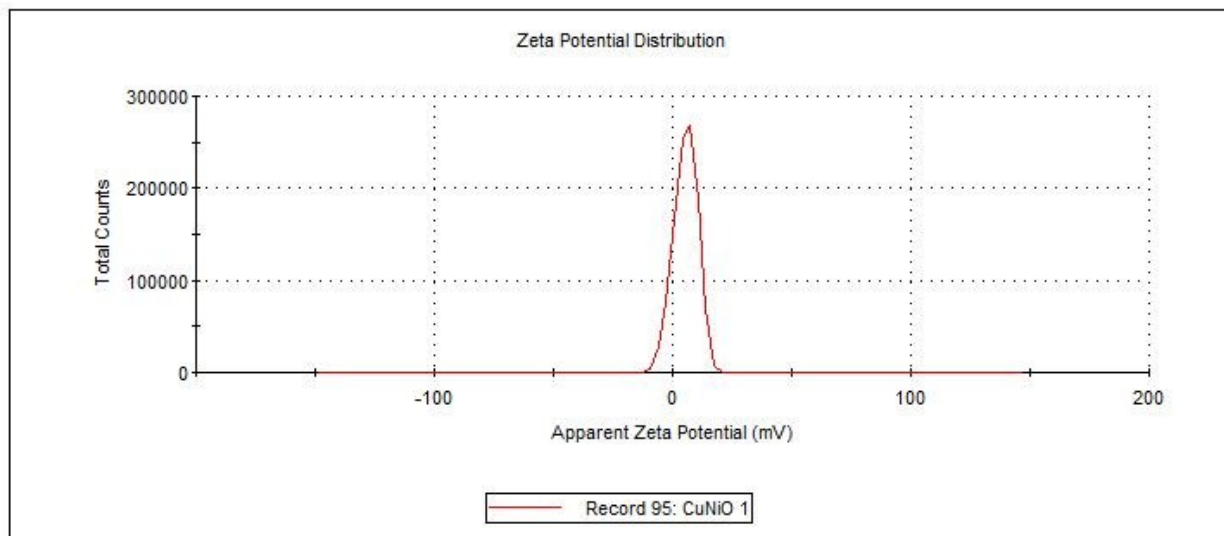

Figure S5: Zeta potential analysis (ZetaSizer nano NS) for  $\text{Cu}_x\text{Ni}_{(1-x)}\text{O}$  coral like nanostructures

Sample Name: NiO 1  
SOP Name: mansettings.nano  
File Name: rishi-go.dts  
Record Number: 93  
Date and Time: Thursday, September 22, 2016 2:44:54 ...

Dispersant Name: Water  
Dispersant RI: 1.330  
Viscosity (cP): 0.8872  
Dispersant Dielectric Constant: 78.5

Temperature (°C): 25.0  
Count Rate (kcps): 232.0  
Cell Description: Clear disposable zeta cell

Zeta Runs: 13  
Measurement Position (mm): 2.00  
Attenuator: 10

|                              | Mean (mV)    | Area (%) | St Dev (mV) |
|------------------------------|--------------|----------|-------------|
| Zeta Potential (mV): 36.3    | Peak 1: 39.2 | 84.6     | 8.34        |
| Zeta Deviation (mV): 12.5    | Peak 2: 12.3 | 13.4     | 5.83        |
| Conductivity (mS/cm): 0.0960 | Peak 3: 62.4 | 2.0      | 2.48        |

Result quality : See result quality report

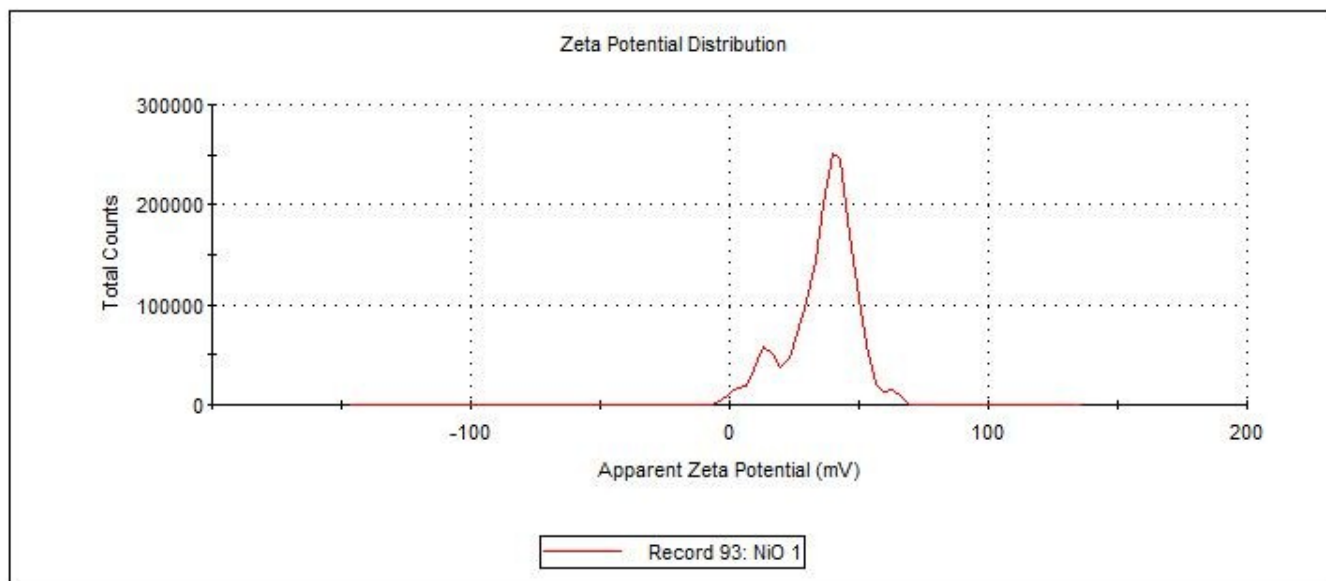

Figure S6: Zeta potential analysis (ZetaSizer nano NS) for NiO coral like nanostructures
